# Supplementary material
Source: PubMed Central journal article supplement (PMC2602671)
Supplement: rspb20071673s01.pdf [file rspb20071673s01.pdf]

Table 1  
*Relationships between plant neurotoxins commonly used as drugs and CNS receptors.*

| Drug             | Plant                      | Toxin                                                                              | Neurotransmitter            | Receptor             |
|------------------|----------------------------|------------------------------------------------------------------------------------|-----------------------------|----------------------|
| Tobacco, Pituri  | <i>Nicotiana, Duboisia</i> | Nicotine <sup>a</sup>                                                              | Acetylcholine               | Nicotinic receptor   |
| Betel nut        | <i>Areca catechu</i>       | Arecoline <sup>a</sup>                                                             | Acetylcholine               | Muscarinic receptor  |
| Coca             | <i>Erythroxylum</i>        | Cocaine <sup>c</sup>                                                               | Norepinephrine, epinephrine | Adrenergic receptors |
| Khat             | <i>Catha edulis</i>        | Ephedrine <sup>c</sup> ,<br>cathinone <sup>a,c</sup>                               | Norepinephrine, epinephrine | Adrenergic receptors |
| Coca             | <i>Erythroxylum</i>        | Cocaine <sup>c</sup>                                                               | Dopamine                    | Dopamine receptor    |
| Khat             | <i>Catha edulis</i>        | Cathinone <sup>a,c</sup>                                                           | Dopamine                    | Dopamine receptor    |
| Coffee, Cola nut | <i>Coffea, Cola nitida</i> | Caffeine <sup>b</sup>                                                              | Adenosine                   | Adenosine receptor   |
| Tea              | <i>Camellia sinensis</i>   | Caffeine <sup>b</sup> ,<br>theophylline <sup>b</sup> ,<br>theobromine <sup>b</sup> | Adenosine                   | Adenosine receptor   |
| Chocolate        | <i>Theobromine cacao</i>   | Theobromine <sup>b</sup>                                                           | Adenosine                   | Adenosine receptor   |
| Opium            | <i>Papaver somniferum</i>  | Codeine <sup>a</sup> ,<br>morphine <sup>a</sup>                                    | Endorphins                  | Opioid receptor      |
| Cannabis         | <i>Cannabis sativa</i>     | $\Delta$ 9-THC <sup>a</sup>                                                        | Anandamide                  | Cannabinoid receptor |

<sup>a</sup>receptor agonist, <sup>b</sup>receptor antagonist, <sup>c</sup>reuptake inhibitor

Table 2

*Human cytochrome P450 natural substrates and enzyme kinetics constants.*  $V_{max}$  is the maximum reaction rate per unit enzyme.  $K_m$ , the Michaelis-Menten constant, is the substrate concentration at which the reaction rate =  $V_{max}/2$  (lower values indicate higher enzyme affinity for substrate).  $V_{max}/K_m$  is an index of enzyme activity (higher values indicate higher enzyme activity). Kinetic values can vary widely; values here are representative of one metabolic pathway (substrates are typically metabolized via multiple pathways). Plants listed are often not the exclusive source of the neurotoxin.

| Enzyme/substrates | Xenobiotic and endogenous sources                           | $K_m$ ( $\mu M$ ) | $V_{max}$           | $V_{max}/K_m$ |
|-------------------|-------------------------------------------------------------|-------------------|---------------------|---------------|
| <b>CYP1A2</b>     |                                                             |                   |                     |               |
| Caffeine          | Plant neurotoxin ( <i>Coffea</i> – coffee)                  | 460               | 570 <sup>b</sup>    | 1.24          |
| Theophylline      | Plant neurotoxin ( <i>Camellia sinensis</i> – tea)          | 310               | 43.3 <sup>b</sup>   | 0.14          |
| Theobromine       | Plant neurotoxin ( <i>Theobromine cacao</i> – chocolate)    | 2580              | 1720 <sup>b</sup>   | 0.67          |
| Aflatoxin B1      | Fungus neurotoxin                                           | 36                | 0.92 <sup>a</sup>   | 0.026         |
| PhIP              | Cooked meat                                                 | 46                | 1.79 <sup>a</sup>   | 0.039         |
| Estradiol         | Sex hormone                                                 | 27.5              | 17.4 <sup>a</sup>   | 0.63          |
| Melatonin         | Hormone                                                     | 25.9              | 10.6 <sup>a</sup>   | 0.41          |
| <b>CYP2A6</b>     |                                                             |                   |                     |               |
| Nicotine          | Plant neurotoxin ( <i>Nicotiana</i> – tobacco)              | 95.3              | 154.1 <sup>b</sup>  | 1.69          |
| Coumarin          | Plant neurotoxin ( <i>Dipteryx odorata</i> – tonka bean)    | 0.6               | 0.6 <sup>a</sup>    | 1.0           |
| Cotinine          | Nicotine metabolite                                         | 234.5             | 37.2 <sup>b</sup>   | 0.16          |
| <b>CYP2B6</b>     |                                                             |                   |                     |               |
| Nicotine          | Plant neurotoxin [induces 2B6 in the brain]                 |                   |                     |               |
| Diazepam          | Synthetic drug; trace amounts in plants                     | 181               | 8.5 <sup>a</sup>    | 0.05          |
| <b>CYP2C8</b>     |                                                             |                   |                     |               |
| Taxol             | Plant neurotoxin ( <i>Taxus brevifolia</i> )                | 5.4               | 30 <sup>a</sup>     | 5.6           |
| Arachidonic acid  | Essential omega-6 fatty acid                                | 71                | 0.078 <sup>a</sup>  | 0.001         |
| Retinol           | Vitamin A                                                   | 50                | 1.2 <sup>a</sup>    | 0.024         |
| <b>CYP2C9</b>     |                                                             |                   |                     |               |
| $\Delta 9$ -THC   | Plant neurotoxin ( <i>Cannabis sativa</i> – marijuana)      | 2.1               | 6.4 <sup>a</sup>    | 3.0           |
| <b>CYP2C19</b>    |                                                             |                   |                     |               |
| Melatonin         | Hormone                                                     | 282.2             |                     |               |
| Progesterone      | Hormone                                                     | 3.6               | 1.4 <sup>a</sup>    | 0.39          |
| <b>CYP2D6</b>     |                                                             |                   |                     |               |
| Codeine           | Plant neurotoxin ( <i>Papaver somniferum</i> – opium poppy) | 190               | 6.4 <sup>a</sup>    | 0.034         |
| Harmaline         | Plant neurotoxin ( <i>Peganum harmala</i> )                 | 1.41              | 39.9 <sup>a</sup>   | 28.3          |
| Harmine           | Plant neurotoxin ( <i>Peganum harmala</i> )                 | 7.42              | 29.7 <sup>a</sup>   | 4.0           |
| Sparteine         | Plant neurotoxin ( <i>Lupinus</i> )                         | 44                |                     |               |
| Yohimbine         | Plant neurotoxin ( <i>Pausinystalia yohimbe</i> )           | 2.0               | 147.4 <sup>b</sup>  | 75.5          |
| <b>CYP2E1</b>     |                                                             |                   |                     |               |
| Theobromine       | Plant neurotoxin ( <i>Theobromine cacao</i> – chocolate)    | 3400              |                     |               |
| Ethanol           | Yeast waste product                                         | 23400             | 23.2 <sup>a</sup>   | 0.001         |
| <b>CYP3A4</b>     |                                                             |                   |                     |               |
| Cocaine           | Plant neurotoxin ( <i>Erythroxylum coca</i> )               | 2700              | 3744.4 <sup>b</sup> | 1.4           |
| Quinine           | Plant neurotoxin ( <i>Cinchona</i> )                        | 106               | 1330 <sup>b</sup>   | 13            |
| Aflatoxin B1      | Fungus neurotoxin                                           | 139               | 61 <sup>a</sup>     | 0.45          |
| Testosterone      | Hormone                                                     | 52                | 5400 <sup>b</sup>   | 101           |
| Cortisol          | Hormone                                                     | 15                | 6.4 <sup>b</sup>    | 0.42          |

<sup>a</sup> pmol/min/pmol P450; <sup>b</sup> pmol/min/mg microsomal protein

Data from Bland, Haining, Tracy, and Callery (2005); Bu (2006); Gates and Miners (1999); Ladona, Gonzalez, Rane, Peter, and Torre (2000); Le Corre et al. (2004); Lewis (2001, 2003); Osikowska-Evers and Eichelbaum (1986); Projean, Morin, Tu, and Ducharme (2003); Yang et al. (1998); Yu, Kneller, Rettie, and Haining (2002); Yu, Idle, Krausz, Kupfer, and Gonzalez (2003); Ma, Idle, Krausz, and Gonzalez (2005); Usmani, Cho, Rose, and Hodgson (2006); Yamazaki and Shimada (1997); Bloomer, Clarke, and Chenery (1995); Murphy, Raulinaitis, and Brown (2005); Hammons et al. (1997); Nakajima et al. (1996, 1996); Tjia, Colbert, and Back (1996); Ha, Follath, Chen, and Krähenbühl (1996); Asai, Imaoka, Kuroki, Monna, and Funae (1996); Marill, Cresteil, Lanotte, and Chabot (2000); Rahman, Korzekwa, Grogan, Gonzalez, and Harris (1994); Campbell, Grant, Inaba, and Kalow (1987); Gallagher, Kunze, Stapleton, and Eaton (1996).

Table 3

*Example ethnic population frequencies of CYP2A6 and CYP2D6 alleles with known in vivo enzyme activity. Frequencies compiled from different studies in the same ethnic population are only approximately comparable.*

| Allele      | Enzyme activity | Population frequencies (%) |                          |                          |                             |                            |
|-------------|-----------------|----------------------------|--------------------------|--------------------------|-----------------------------|----------------------------|
|             |                 | Ghanaian <sup>1</sup>      | Caucasian <sup>2,3</sup> | Chinese <sup>1,2,3</sup> | Japanese <sup>1,2,3,4</sup> |                            |
| CYP2A6*1A/B | Normal          | 91.9                       | 88.4                     | 61.7                     | 48.3                        |                            |
| CYP2A6*2    | None            | 0                          | 2.3                      | 0                        | 0                           |                            |
| CYP2A6*4    | None            | 1.9                        | 1.2                      | 15.1                     | 20.1                        |                            |
| CYP2A6*5    | None            | 0                          | 0                        | 1                        | 0                           |                            |
| CYP2A6*7    | Reduced         | 0                          | 0                        | 2.2                      | 6.5                         |                            |
| CYP2A6*9    | Reduced         | 5.7                        | 5.2                      | 15.7                     | 21.3                        |                            |
| CYP2A6*10   | Reduced         | 0                          | 0                        | 0.4                      | 1.1                         |                            |
| CYP2A6*12   | Reduced         |                            | 3                        | 0                        | 0                           |                            |
|             |                 | Black African <sup>5</sup> | Caucasian <sup>5</sup>   | Asian <sup>5</sup>       | Ethiopian <sup>6</sup>      | Saudi Arabian <sup>7</sup> |
| CYP2D6*2xn  | Increased       | 2                          | 1-5                      | 0-2                      | 16.0                        | 10.4                       |
| CYP2D6*4    | None            | 2                          | 12-21                    | 1                        | 1.2                         | 3.5                        |
| CYP2D6*5    | None            | 4                          | 2-7                      | 6                        | 3.3                         | 1.0                        |
| CYP2D6*10   | Reduced         | 6                          | 1-2                      | 51                       | 8.6                         | 3.0                        |
| CYP2D6*17   | Reduced*        | 20-35                      | 0                        | 0                        | 9.0                         | 3.0                        |

1: Gyamfi, Fujieda, Kiyotani, Yamazaki, and Kamataki (2005); 2: Nakajima, Kuroiwa, and Yokoi (2002);

3: Haberl et al. (2005); 4: Yoshida et al. (2003); 5: Ingelman-Sundberg (2005); 6: Aklillu et al. (1996);

7: McLellan, Oscarson, Seidegård, Evans, and Ingelman-Sundberg (1997)

## References

- Aklillu, E., Persson, I., Bertilsson, L., Johansson, I., Rodrigues, F., and Ingelman-Sundberg, M. (1996). Frequent distribution of ultrarapid metabolizers of debrisoquine in an Ethiopian population carrying duplicated and multiduplicated functional CYP2D6 alleles. *J Pharmacol Exp Ther*, 278:441–446.
- Asai, H., Imaoka, S., Kuroki, T., Monna, T., and Funae, Y. (1996). Microsomal ethanol oxidizing system activity by human hepatic cytochrome P450s. *J Pharmacol Exp Ther*, 277(2):1004–1009.
- Bland, T., Haining, R., Tracy, T., and Callery, P. (2005). CYP2C-catalyzed delta9-tetrahydrocannabinol metabolism: kinetics, pharmacogenetics and interaction with phenytoin. *Biochem Pharmacol*, 70(7):1096–103.
- Bloomer, J. C., Clarke, S. E., and Chenery, R. J. (1995). Determination of P4501A2 activity in human liver microsomes using [3-14C-methyl] caffeine. *Xenobiotica*, 25(9):917–27.
- Bu, H. Z. (2006). A literature review of enzyme kinetic parameters for CYP3A4-mediated metabolic reactions of 113 drugs in human liver microsomes: Structure-kinetics relationship assessment. *Current Drug Metabolism*, 7(3):231–249.
- Campbell, M. E., Grant, D. M., Inaba, T., and Kalow, W. (1987). Biotransformation of caffeine, paraxanthine, theophylline, and theobromine by polycyclic aromatic hydrocarbon-inducible cytochrome (s) P-450 in human liver microsomes. *Drug Metabolism and Disposition*, 15(2):237–249.
- Gates, S. and Miners, J. O. (1999). Cytochrome P450 isoform selectivity in human hepatic theobromine metabolism. *British Journal of Clinical Pharmacology*, 47(3):299–305.
- Gyamfi, M., Fujieda, M., Kiyotani, K., Yamazaki, H., and Kamataki, T. (2005). High prevalence of cytochrome P 450 2A6\* 1A alleles in a black African population of Ghana. *European Journal of Clinical Pharmacology*, 60(12):855–857.
- Ha, H. R., Follath, F., Chen, J., and Krähenbühl, S. (1996). Biotransformation of caffeine by cDNA-expressed human cytochromes P-450. *European Journal of Clinical Pharmacology*, 49(4):309–315.
- Haberl, M., Anwald, B., Klein, K., Weil, R., Fuss, C., Gepdiremen, A., Zanger, U., Meyer, U., and Wojnowski, L. (2005). Three haplotypes associated with CYP2A6 phenotypes in Caucasians. *Pharmacogenet Genomics*, 15:609–624.
- Hammons, G. J., Milton, D., Stepps, K., Guengerich, F. P., Tukey, R. H.,

- and Kadlubar, F. F. (1997). Metabolism of carcinogenic heterocyclic and aromatic amines by recombinant human cytochrome P450 enzymes. *Carcinogenesis*, 18:851–854.
- Ingelman-Sundberg, M. (2005). Genetic polymorphisms of cytochrome P450 2D6 (CYP2D6): clinical consequences, evolutionary aspects and functional diversity. *The Pharmacogenomics Journal*, 5:6–13.
- Ladona, M., Gonzalez, M., Rane, A., Peter, R., and de la Torre, R. (2000). Cocaine metabolism in human fetal and adult liver microsomes is related to cytochrome P450 3A expression. *Life Sci*, 68(4):431–43.
- Le Corre, P., Parmer, R., Kailasam, M., Kennedy, B., Skaar, T., Ho, H., Leverage, R., Smith, D., Ziegler, M., Insel, P., et al. (2004). Human sympathetic activation by  $\alpha$ -adrenergic blockade with yohimbine: Bimodal, epistatic influence of cytochrome P450-mediated drug metabolism. *Clinical Pharmacology & Therapeutics*, 76(2):139–153.
- Lewis, D. F. V. (2001). *Guide to Cytochromes P450: Structure and Function*. Taylor and Francis, London.
- Lewis, D. F. V. (2003). Human cytochromes P450 associated with the phase 1 metabolism of drugs and other xenobiotics: A compilation of substrates and inhibitors of the CYP1, CYP2 and CYP3 families. *Current Medicinal Chemistry*, 10:1955–1972.
- Ma, X., Idle, J. R., Krausz, K. W., and Gonzalez, F. J. (2005). Metabolism of melatonin by human cytochromes P450. *Drug Metab Dispos*, 33(4):489–94.
- Marill, J., Cresteil, T., Lanotte, M., and Chabot, G. G. (2000). Identification of human cytochrome P450s involved in the formation of all-trans-retinoic acid principal metabolites. *Molecular Pharmacology*, 58(6):1341.
- McLellan, R. A., Oscarson, M., Seidegård, J., Evans, D. A., and Ingelman-Sundberg, M. (1997). Frequent occurrence of CYP2D6 gene duplication in Saudi Arabians. *Pharmacogenetics*, 7:187–91.
- Murphy, S., Raulinaitis, V., and Brown, K. (2005). Nicotine 5'-oxidation and methyl oxidation by P450 2A enzymes. *Drug Metab Dispos*, 33(8):1166–1173.
- Nakajima, M., Kuroiwa, Y., and Yokoi, T. (2002). Interindividual differences in nicotine metabolism and genetic polymorphisms of human CYP2A6. *Drug Metabolism Reviews*, 34(4):865–877.
- Nakajima, M., Yamamoto, T., Nunoya, K., Yokoi, T., Nagashima, K., Inoue, K., Funae, Y., Shimada, N., Kamataki, T., and Kuroiwa, Y. (1996a). Characterization of CYP2A6 involved in 3'-hydroxylation

- of cotinine in human liver microsomes. *J Pharmacol Exp Ther*, 277(2):1010–1015.
- Nakajima, M., Yamamoto, T., Nunoya, K., Yokoi, T., Nagashima, K., Inoue, K., Funae, Y., Shimada, N., Kamataki, T., and Kuroiwa, Y. (1996b). Role of human cytochrome P4502A6 in C-oxidation of nicotine. *Drug Metab Dispos*, 24(11):1212–1217.
- Osikowska-Evers, B. and Eichelbaum, M. (1986). A sensitive capillary GC assay for the determination of sparteine oxidation products in microsomal fractions of human liver. *Life Sci*, 38(19):1775–82.
- Projean, D., Morin, P. E., Tu, T. M., and Ducharme, J. (2003). Identification of CYP3A4 and CYP2C8 as the major cytochrome P450s responsible for morphine N-demethylation in human liver microsomes. *Xenobiotica*, 33(8):841–854.
- Rahman, A., Korzekwa, K. R., Grogan, J., Gonzalez, F. J., and Harris, J. W. (1994). Selective biotransformation of taxol to 6 alpha-hydroxytaxol by human cytochrome P450 2C8. *Cancer Research*, 54(21):5543–5546.
- Tjia, J. F., Colbert, J., and Back, D. J. (1996). Theophylline metabolism in human liver microsomes: inhibition studies. *J Pharmacol Exp Ther*, 276(3):912–917.
- Usmani, K. A., Cho, T. M., Rose, R. L., and Hodgson, E. (2006). Inhibition of the human liver microsomal and human cytochrome P450 1A2 and 3A4 metabolism of estradiol by deployment-related and other chemicals. *Drug Metabolism and Disposition*, 34(9):1606–1614.
- Yamazaki, H. and Shimada, T. (1997). Progesterone and testosterone hydroxylation by cytochromes P450 2C19, 2C9, and 3A4 in human liver microsomes. *Archives of Biochemistry and Biophysics*, 346(1):161–169.
- Yang, T. J., Shou, M., Korzekwa, K. R., Gonzalez, F. J., Gelboin, H. V., and Yang, S. K. (1998). Role of cDNA-expressed human cytochromes P450 in the metabolism of diazepam. *Biochemical Pharmacology*, 55(6):889–896.
- Yoshida, R., Nakajima, M., Nishimura, K., Tokudome, S., Kwon, J.-T., and Yokoi, T. (2003). Effects of polymorphism in promoter region of human CYP2A6 gene (CYP2A6\*9) on expression level of messenger ribonucleic acid and enzymatic activity in vivo and in vitro. *Clinical Pharmacology and Therapeutics*, 74:69–76.
- Yu, A., Idle, J., Krausz, K., Kupfer, A., and Gonzalez, F. (2003). Contribution of individual cytochrome P450 isozymes to the O-demethylation of the psychotropic ®-carboline alkaloids

- harmaline and harmine. *Journal of Pharmacology and Experimental Therapeutics*, 305(1):315–322.
- Yu, A., Kneller, B., Rettie, A., and Haining, R. (2002). Expression, purification, biochemical characterization, and comparative function of human cytochrome P450 2D6. 1, 2D6. 2, 2D6. 10, and 2D6. 17 allelic isoforms. *Journal of Pharmacology and Experimental Therapeutics*, 303(3):1291–1300.
